# Supplementary material
Source: Springer Nature journal article supplement (https://www.springermedizin.de/resource/supplementary/12875_2014_1044_MOESM3_ESM.pdf/9436024)
Supplement: MOESM3 [file 9436024]

Enrolment

2758 Practices assessed for eligibility (3 waves)

2676 Practices refused to participate

82 Practices randomized (=124 GPs)

Allocation

41 Practices allocated to intervention (= 64 GPs)

41 practices allocated to control (= 60GPs)

Follow-up

Drop outs: 5 GPs did not fill in questionnaire T0 and T1

Lost to follow-up: 7 GPs did not fill in questionnaire T0 and T1

Analysis

Analysed with multiple imputation: 59 GPs

Analysed multiple imputation: 53 GPs
